# Supplementary material for: Associations of Plasma Concentrations of Dichlorodiphenyldichloroethylene and Polychlorinated Biphenyls with Prostate Cancer: A Case–Control Study in Guadeloupe (French West Indies)
Source: PubMed Central journal article supplement (PMC4384204; doi:10.1289/ehp.1408407), 2014-11-21
Supplement: ehp.1408407.s001.508.pdf [file ehp.1408407.s001.508.pdf]

**Supplemental Material**

**Associations of Plasma Concentrations of  
Dichlorodiphenyldichloroethylene and Polychlorinated Biphenyls  
with Prostate Cancer: A Case–Control Study in Guadeloupe  
(French West Indies)**

Elise Emeville, Arnaud Giusti, Xavier Coumoul, Jean-Pierre Thomé, Pascal Blanchet, and Luc  
Multigner

**Table S1.** Spearman's rank correlation analysis of the relationship between concentrations of frequently detected (Limit of detection >80 %) pollutants in plasma samples from controls subjects and cases patients.

| <b>Controls subjects (n = 655)</b> | <b>PCB138</b>             | <b>PCB153</b>             | <b>PCB180</b>             | <b>Chlordecone</b>         |
|------------------------------------|---------------------------|---------------------------|---------------------------|----------------------------|
| DDE                                | $r = 0.48$<br>$P < 0.001$ | $r = 0.38$<br>$P < 0.001$ | $r = 0.26$<br>$P < 0.001$ | $r = 0.05$<br>$P = 0.18$   |
| PCB138                             | -                         | $r = 0.88$<br>$P < 0.001$ | $r = 0.84$<br>$P < 0.001$ | $r = 0.10$<br>$P = 0.007$  |
| PCB153                             | -                         | -                         | $r = 0.81$<br>$P < 0.001$ | $r = 0.07$<br>$P = 0.06$   |
| PCB180                             | -                         | -                         | -                         | $r = 0.09$<br>$P = 0.002$  |
| <b>Cases patients (n = 576)</b>    |                           |                           |                           |                            |
| DDE                                | $r = 0.50$<br>$P < 0.001$ | $r = 0.44$<br>$P < 0.001$ | $r = 0.33$<br>$P < 0.001$ | $r = 0.04$<br>$P = 0.29$   |
| PCB138                             | -                         | $r = 0.84$<br>$P < 0.001$ | $r = 0.82$<br>$P < 0.001$ | $r = 0.12$<br>$P = 0.003$  |
| PCB153                             | -                         | -                         | $r = 0.76$<br>$P < 0.001$ | $r = 0.07$<br>$P = 0.09$   |
| PCB180                             | -                         | -                         | -                         | $r = 0.14$<br>$P = 0.0008$ |

**Table S2.** Geometric means of DDE and PCB153 plasma concentrations according to study population characteristics.

| <b>Characteristic</b>                      | <b>DDE<br/>Geometric means<br/>(CI 95%)</b> | <b>P value<sup>a</sup></b> | <b>PCB153<br/>Geometric means<br/>(CI 95%)</b> | <b>P-value<sup>a</sup></b> |
|--------------------------------------------|---------------------------------------------|----------------------------|------------------------------------------------|----------------------------|
| <b>Caribbean origin</b>                    |                                             | 0.42                       |                                                | <0.001                     |
| French West Indies                         | 1.96 (1.78, 2.15)                           |                            | 0.78 (0.73, 0.83)                              |                            |
| Haiti or Dominica                          | 1.71 (1.19, 2.45)                           |                            | 0.28 (0.22, 0.35)                              |                            |
| <b>Education</b>                           |                                             | 0.59                       |                                                | 0.61                       |
| Primary                                    | 1.84 (1.62, 2.09)                           |                            | 0.78 (0.64, 0.95)                              |                            |
| Secondary                                  | 2.00 (1.67, 2.40)                           |                            | 0.72 (0.63, 0.81)                              |                            |
| High school and higher                     | 2.02 (1.62, 2.68)                           |                            | 0.72 (0.66, 0.78)                              |                            |
| <b>Body mass index (kg/m<sup>2</sup>)</b>  |                                             | <0.001                     |                                                | 0.03                       |
| <25                                        | 1.59 (1.38, 1.84)                           |                            | 0.68 (0.62, 0.75)                              |                            |
| 25 - <30                                   | 2.06 (1.78, 2.40)                           |                            | 0.79 (0.72, 0.88)                              |                            |
| >30                                        | 3.02 (2.27, 4.02)                           |                            | 0.73 (0.60, 0.89)                              |                            |
| <b>Waist-to-hip-ratio</b>                  |                                             | <0.001                     |                                                | 0.01                       |
| <0.95                                      | 1.66 (1.47, 1.88)                           |                            | 0.70 (0.64, 0.77)                              |                            |
| >0.95                                      | 2.50 (2.12, 2.95)                           |                            | 0.83 (0.74, 0.93)                              |                            |
| <b>Smoking</b>                             |                                             | 0.35                       |                                                | 0.01                       |
| Never                                      | 1.89 (1.68, 2.12)                           |                            | 0.69 (0.64,0.75)                               |                            |
| Former or current                          | 2.04 (1.76, 2.36)                           |                            | 0.80 (0.73,0.89)                               |                            |
| <b>Alcohol consumption</b>                 |                                             | 0.01                       |                                                | 0.009                      |
| Never                                      | 1.53 (1.21, 1.92)                           |                            | 0.62 (0.52, 0.72)                              |                            |
| Former or current                          | 2.02 (1.83, 2.23)                           |                            | 0.75 (0.70, 0.81)                              |                            |
| <b>Type 2 diabetes</b>                     |                                             | <0.001                     |                                                | 0.02                       |
| No                                         | 1.81 (1.64, 1.99)                           |                            | 0.72 (0.67, 0.77)                              |                            |
| Yes                                        | 2.71 (2.15, 3.42)                           |                            | 0.86 (0.73, 1.01)                              |                            |
| <b>PSA screening history</b>               |                                             | 0.30                       |                                                | 0.44                       |
| No                                         | 1.83 (1.69, 2.10)                           |                            | 0.72 (0.67, 0.78)                              |                            |
| Yes                                        | 2.06 (1.75, 2.43)                           |                            | 0.76 (0.68, 0.85)                              |                            |
| <b>Family history of prostate cancer</b>   |                                             | 0.66                       |                                                | 0.36                       |
| No                                         | 1.95 (1.73, 2.20)                           |                            | 0.75 (0.69, 0.81)                              |                            |
| Yes                                        | 1.94 (1.53, 2.46)                           |                            | 0.67 (0.57, 0.79)                              |                            |
| Do not know                                | 1.75 (1.36, 2.26)                           |                            | 0.73 (0.61, 0.87)                              |                            |
| <b>Past residence in Western countries</b> |                                             | 0.71                       |                                                | <0.001                     |
| No                                         | 1.92 (1.67, 2.37)                           |                            | 0.65 (0.61, 0.70)                              |                            |
| Yes                                        | 1.99 (1.73, 2.14)                           |                            | 1.00 (0.89, 1.13)                              |                            |

<sup>a</sup>P-values were calculated using ANOVA tests (two-sided).

**Table S3.** Sensitivity analysis of the association between DDE exposure and prostate cancer.

|                                                                                                                | DDE exposure<br><0.79 µg/L | DDE exposure<br>0.79-1.62 µg/L | DDE exposure<br>1.63-2.89 µg/L | DDE exposure<br>2.90-5.18 µg/L | DDE exposure<br>≥5.19 µg/L | P-Trend |
|----------------------------------------------------------------------------------------------------------------|----------------------------|--------------------------------|--------------------------------|--------------------------------|----------------------------|---------|
| <b>Controls subjects/cases patients (n)</b>                                                                    | 131/106                    | 130/96                         | 133/111                        | 131/104                        | 130/159                    |         |
| <b>Adjusted<sup>a</sup></b><br>OR (95% CI)                                                                     | 1.0                        | 0.96 (0.66, 1.42)              | 1.05 (0.71, 1.55)              | 1.02 (0.67, 1.53)              | 1.53 (1.02, 2.30)          | 0.01    |
| <b>Adjusted<sup>b</sup></b><br>OR (95% CI)                                                                     | 1.0                        | 1.00 (0.63, 1.56)              | 1.05 (0.66, 1.64)              | 1.01 (0.63, 1.62)              | 1.64 (1.04, 2.59)          | 0.007   |
| <b>Adjusted<sup>c</sup></b><br>OR (95% CI)                                                                     | 1.0                        | 1.04 (0.65, 1.63)              | 1.03 (0.64, 1.64)              | 0.99 (0.61, 1.61)              | 1.73 (1.08, 2.78)          | 0.006   |
| <b>Adjusted<sup>a</sup> including BMI</b><br>OR (95% CI)                                                       | 1.0                        | 0.96 (0.65, 1.43)              | 1.05 (0.70, 1.55)              | 1.01 (0.67, 1.53)              | 1.54 (1.03, 2.31)          | 0.01    |
| <b>Adjusted<sup>a</sup> including family history of prostate cancer</b><br>OR (95% CI)                         | 1.0                        | 1.00 (0.66, 1.51)              | 1.08 (0.72, 1.62)              | 1.01 (0.66, 1.55)              | 1.64 (1.08, 2.48)          | 0.006   |
| <b>Adjusted<sup>a</sup> including PSA screening history</b><br>OR (95% CI)                                     | 1.0                        | 1.00 (0.70, 1.64)              | 1.06 (0.69, 1.64)              | 1.05 (0.67, 1.65)              | 1.55 (1.00, 2.41)          | 0.03    |
| <b>Adjusted<sup>a</sup> including chlordecone</b><br>OR (95% CI)                                               | 1.0                        | 0.92 (0.62, 1.37)              | 1.04 (0.70, 1.54)              | 1.03 (0.68, 1.56)              | 1.51 (1.01, 2.27)          | 0.01    |
| <b>Adjusted<sup>a,d</sup> excluding subjects with BMI &lt;18.5 and subjects with BMI &gt;30</b><br>OR (95% CI) | 1.0                        | 1.00 (0.66, 1.54)              | 0.99 (0.65, 1.53)              | 1.07 (0.70, 1.66)              | 1.43 (0.93, 2.20)          | 0.04    |

<sup>a</sup>Adjusted for age, waist-to-hip-ratio, type 2 diabetes, alcohol, total plasma lipid concentration and PCB153, with missing values imputed using a Multiple Imputation by Chained Equation (MICE) approach in five data sets. <sup>b</sup>Adjusted for age, waist-to-hip-ratio, type 2 diabetes, alcohol, total plasma lipid concentration and PCB153, with missing value indicator categories. <sup>c</sup>Adjusted for age, waist-to-hip-ratio, type 2 diabetes, alcohol, total plasma lipid concentration and PCB153, and restricted to controls and cases with complete datasets. No. of controls/cases were, 125/64, 126/62, 126/63, 125/59, and 120/101 for quintiles 1 to 5 respectively. <sup>d</sup>No. of controls/cases were, 121/95, 108/81, 124/ 87, 110/88, and 110/120 for quintiles 1 to 5 respectively.

**Table S4.** Sensitivity analysis of the association between PCB153 exposure and prostate cancer.

|                                                                                                                | PCB153 exposure<br><0.41 µg/L | PCB153 exposure<br>0.41-0.69 µg/L | PCB153 exposure<br>0.70-1.07 µg/L | PCB153 exposure<br>1.08-1.70 µg/L | PCB153 exposure<br>>1.71 µg/L | P-Trend |
|----------------------------------------------------------------------------------------------------------------|-------------------------------|-----------------------------------|-----------------------------------|-----------------------------------|-------------------------------|---------|
| <b>Controls subjects/cases patients (n)</b>                                                                    | 132/141                       | 132/109                           | 134/135                           | 131/110                           | 130/159                       |         |
| <b>Adjusted<sup>a</sup></b><br>OR (95% CI)                                                                     | 1.0                           | 0.56 (0.38, 0.83)                 | 0.67 (0.46, 0.99)                 | 0.45 (0.30, 0.63)                 | 0.30 (0.19, 0.47)             | <0.001  |
| <b>Adjusted<sup>b</sup></b><br>OR (95% CI)                                                                     | 1.0                           | 0.65 (0.42, 1.01)                 | 0.68 (0.43, 1.05)                 | 0.43 (0.27, 0.70)                 | 0.31 (0.18, 0.52)             | <0.001  |
| <b>Adjusted<sup>c</sup></b><br>OR (95% CI)                                                                     | 1.0                           | 0.64 (0.44, 1.09)                 | 0.74 (0.47, 1.65)                 | 0.40 (0.25, 0.66)                 | 0.29 (0.17, 0.50)             | <0.001  |
| <b>Adjusted<sup>a</sup> including BMI</b><br>OR (95% CI)                                                       | 1.0                           | 0.56 (0.38, 0.83)                 | 0.67 (0.46, 0.99)                 | 0.45 (0.30, 0.69)                 | 0.30 (0.19, 0.47)             | <0.001  |
| <b>Adjusted<sup>a</sup> including family history of prostate cancer</b><br>OR (95% CI)                         | 1.0                           | 0.60 (0.40, 0.89)                 | 0.67 (0.45, 1.00)                 | 0.48 (0.31, 0.73)                 | 0.31 (0.19, 0.49)             | <0.001  |
| <b>Adjusted<sup>a</sup> including PSA screening history</b><br>OR (95% CI)                                     | 1.0                           | 0.60 (0.40, 0.92)                 | 0.68 (0.45, 1.03)                 | 0.42 (0.26, 0.65)                 | 0.31 (0.19, 0.51)             | <0.001  |
| <b>Adjusted<sup>a</sup> including chlordecone</b><br>OR (95% CI)                                               | 1.0                           | 0.54 (0.37, 0.80)                 | 0.64 (0.43, 0.65)                 | 0.43 (0.28, 0.65)                 | 0.28 (0.18, 0.45)             | <0.001  |
| <b>Adjusted<sup>a,d</sup> excluding subjects with BMI &lt;18.5 and subjects with BMI &gt;30</b><br>OR (95% CI) | 1.0                           | 0.65 (0.43, 1.00)                 | 0.73 (0.47, 1.11)                 | 0.54 (0.36, 0.86)                 | 0.31 (0.18, 0.51)             | <0.001  |

<sup>a</sup>Adjusted for age, waist-to-hip-ratio, diabetes type 2, Caribbean origin, past residence in western countries, total plasma lipid concentration and DDE, with missing values imputed using a Multiple Imputation by Chained Equation (MICE) approach in five data sets. <sup>b</sup>Adjusted for age, waist-to-hip-ratio, diabetes type 2, Caribbean origin, past residence in western countries, total plasma lipid concentration and DDE, with missing value indicator categories. <sup>c</sup>Adjusted for age, waist-to-hip-ratio, diabetes type 2, Caribbean origin, past residence in western countries, total plasma lipid concentration and DDE, and restricted to controls and cases with complete datasets for. No. of controls/cases were 119/129, 111 /94, 123/118, 111/ 101, and 113/73 for quintiles 1 to 5 respectively. <sup>d</sup>No. of controls/cases were, 115/110, 109/90, 117/108, 108/97, and 112/66 for quintiles 1 to 5 respectively.

**Table S5.** PCB153 exposure and prostate cancer according to family history of prostate cancer.

| PCB153 exposure (µg/L) | No family history<br>No. controls | No family history<br>No. cases | No family history:<br>Adjusted<br>OR <sup>a</sup> (95% CI) | With family history<br>No. controls | With family history<br>No. cases | With family history:<br>Adjusted<br>OR <sup>a</sup> (95% CI) | P-Interaction |
|------------------------|-----------------------------------|--------------------------------|------------------------------------------------------------|-------------------------------------|----------------------------------|--------------------------------------------------------------|---------------|
| <0.41                  | 87                                | 47                             | 1.0                                                        | 17                                  | 22                               | 1.0                                                          |               |
| 0.41-0.69              | 99                                | 38                             | 0.42 (0.23, 0.78)                                          | 12                                  | 14                               | 0.98 (0.29, 3.32)                                            | 0.31          |
| 0.70-1.07              | 97                                | 41                             | 0.47 (0.23, 0.80)                                          | 14                                  | 23                               | 1.91 (0.60, 6.10)                                            | 0.07          |
| 1.08-1.70              | 99                                | 36                             | 0.30 (0.16, 0.59)                                          | 7                                   | 15                               | 1.28 (0.33, 5.03)                                            | 0.10          |
| >1.71                  | 96                                | 28                             | 0.20 (0.10, 0.41)                                          | 10                                  | 14                               | 0.84 (0.20, 3.40)                                            | 0.09          |
| <b>P-Trend</b>         |                                   |                                | <0.001                                                     |                                     |                                  | 0.88                                                         |               |

<sup>a</sup>Adjusted for age, waist-to-hip-ratio, Caribbean origin, past residence in western countries, type 2 diabetes, total plasma lipid concentration, alcohol and DDE, and restricted to controls and cases with complete datasets for.

**Table S6.** ORs (95% CIs) of prostate cancer according to quintile of chlordecone.

|                                                             | <b>Chlordecone exposure &lt;0.13 µg/L</b> | <b>Chlordecone exposure 0.13-0.30 µg/L</b> | <b>Chlordecone exposure 0.31-0.51 µg/L</b> | <b>Chlordecone exposure 0.52-1.02 µg/L</b> | <b>Chlordecone exposure ≥1.03 µg/L</b> | <b>P-Trend</b> |
|-------------------------------------------------------------|-------------------------------------------|--------------------------------------------|--------------------------------------------|--------------------------------------------|----------------------------------------|----------------|
| <b>Controls subjects/cases patients (n)</b>                 | 132/113                                   | 128/85                                     | 131/127                                    | 134/121                                    | 130/130                                |                |
| <b>Adjusted<sup>a</sup></b><br>OR (95% CI)                  | 1.0                                       | 1.00 (0.65, 1.54)                          | 1.47 (0.98, 2.21)                          | 1.41 (0.94, 2.13)                          | 1.65 (1.09, 2.48)                      | 0.01           |
| <b>Adjusted<sup>a</sup> including DDE</b><br>OR (95% CI)    | 1.0                                       | 1.01 (0.66, 1.56)                          | 1.48 (0.99, 2.22)                          | 1.41 (0.93, 2.12)                          | 1.64 (1.09, 2.47)                      | 0.01           |
| <b>Adjusted<sup>a</sup> including PCB153</b><br>OR (95% CI) | 1.0                                       | 0.98 (0.64, 1.52)                          | 1.51 (1.01, 2.27)                          | 1.45 (0.96, 2.27)                          | 1.70 (1.12, 2.56)                      | 0.008          |

<sup>a</sup>Adjusted for age, waist-to-hip-ratio, PSA screening history, and total plasma lipid concentration. Missing values were imputed using a Multiple Imputation by Chained Equation (MICE) approach in five datasets.
